# Supplementary material for: 2′-Fluoro-c-di-GMP as an oral vaccine adjuvant
Source: Royal Society of Chemistry journal article supplement (doi:10.1039/c9ra08310c), 2019-01-01
Supplement: c9ra08310c1.pdf [file c9ra08310c1.pdf]

## **2'-Fluoro-c-di-GMP as an oral vaccine adjuvant**

Jia Li,<sup>a</sup> Rhonda Kuo Lee,<sup>b</sup> Wangxue Chen,<sup>b,c\*</sup> Hongbin Yan<sup>a\*</sup>

<sup>a</sup>*Department of Chemistry, Brock University, 1812 Sir Isaac Brock Way, St. Catharines, ON L2S 3A1, Canada Email: tyan@brocku.ca*

<sup>b</sup>*Human Health and Therapeutics Research Center, National Research Council of Canada, 100 Sussex Dr. Ottawa, ON K1A 0R6, Canada. Email: wangxue.chen@nrc-cnrc.gc.ca*

<sup>c</sup>*Department of Biological Sciences, Brock University, 1812 Sir Isaac Brock Way, St. Catharines, ON L2S 3A1, Canada.*

(a)

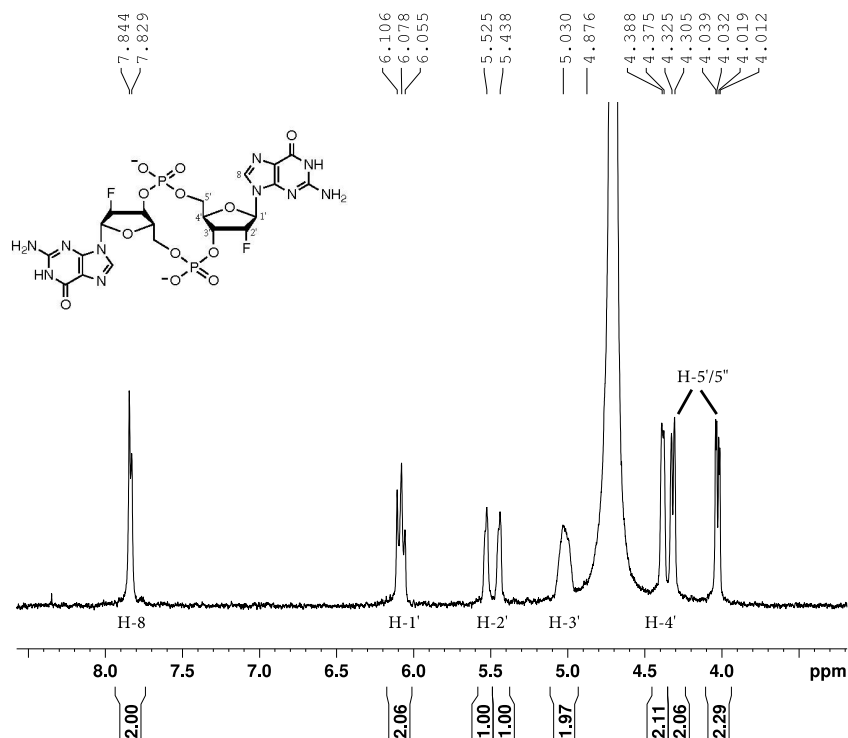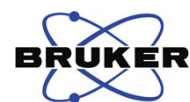

Current Data Parameters  
NAME JL-3-39  
EXPNO 18  
PROCNO 1

F2 - Acquisition Parameters  
Date\_ 20110405  
Time 13.56  
INSTRUM spect  
PROBHD 5 mm PABBO BB-  
PULPROG zg30  
TD 32768  
SOLVENT D2O  
NS 16  
DS 0  
SWH 12376.237 Hz  
FIDRES 0.377693 Hz  
AQ 1.3238271 sec  
RG 256  
DW 40.400 usec  
DE 6.00 usec  
TE 296.7 K  
D1 1.00000000 sec  
TD0 1

----- CHANNEL f1 -----  
NUC1 1H  
P1 11.00 usec  
PL1 -4.00 dB  
PL1W 31.54786682 W  
SF01 600.2037065 MHz

F2 - Processing parameters  
SI 32768  
SF 600.2000000 MHz  
WDW EM  
SSB 0  
LB 1.00 Hz  
GB 0  
PC 1.00

(b)

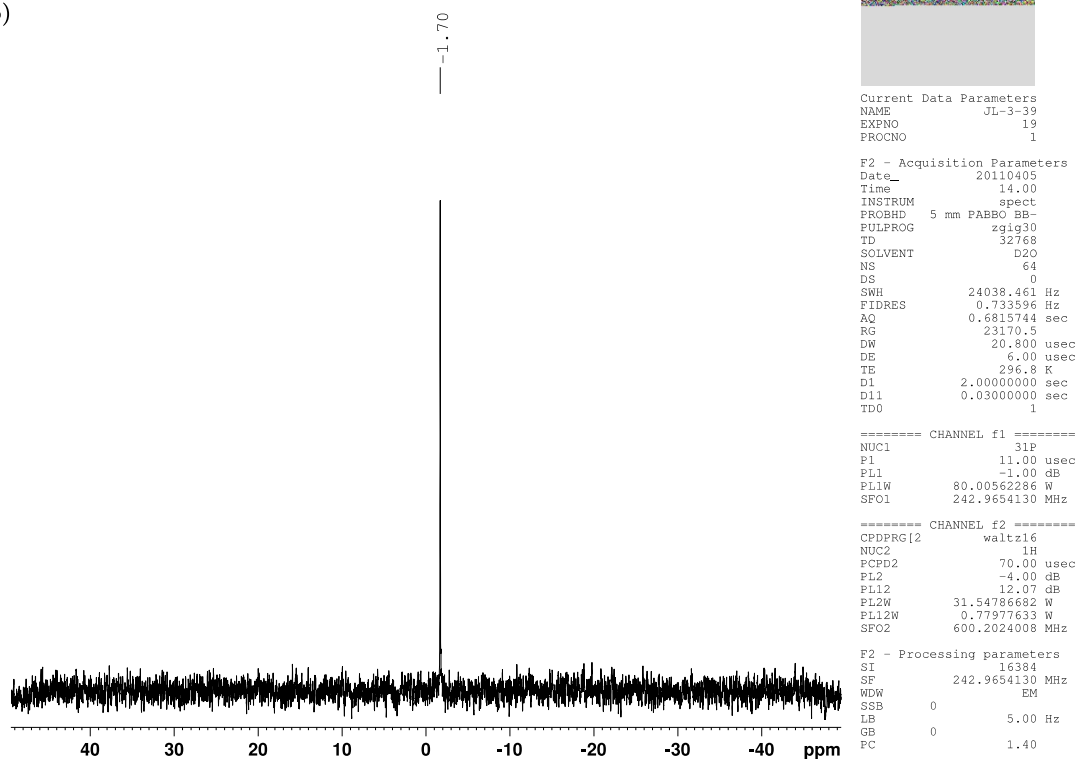

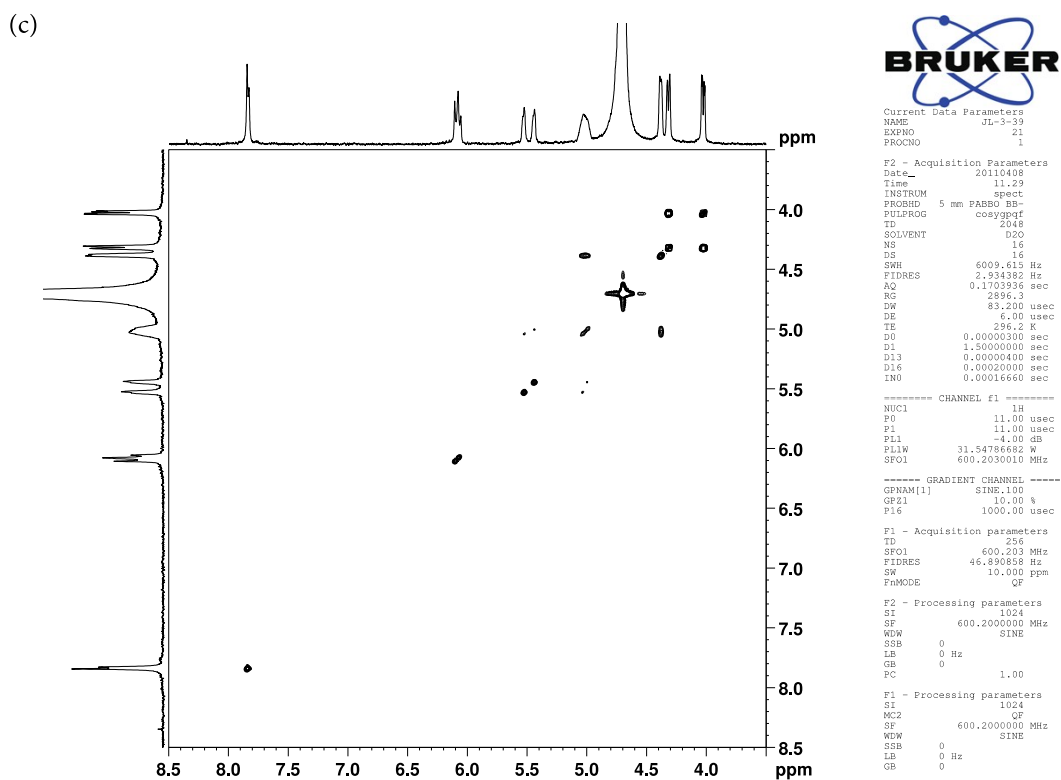

**Figure S1.** NMR spectra of the fully-deprotected 2'-F-c-di-GMP in D<sub>2</sub>O. a) <sup>1</sup>H NMR, b) <sup>31</sup>P and c) COSY.

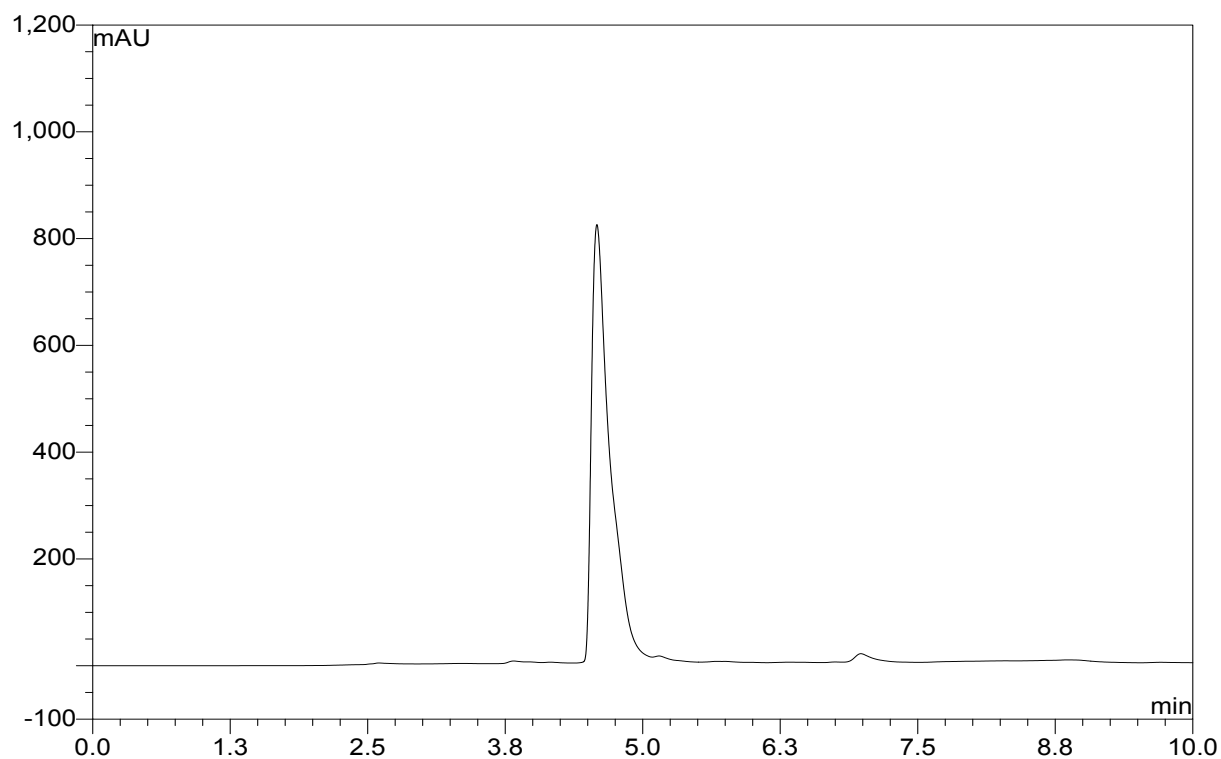

**Figure S2.** HPLC profile of the fully deblocked 2'-F-c-di-GMP. The column (Clarity 3  $\mu$ m oligo reverse phase, 4.6 $\times$ 50 mm) was eluted with a linear gradient of acetonitrile – triethylammonium acetate (20 mM, pH 7.00) (0:100 to 15:85, v.v, over 10 min at 0.7 ml/min).

## Brock MS Facility - Bruker HCT Ultra - LCMS

### Analysis Info

Analysis Name D:\Data\Tims\JL040811b.d  
Method TJinfNeg.m  
Sample Name JL3-39  
Comment JL/TY/JL3-39/692  
Infusion in MeOH/H2O/TEA(5 additions)

Acquisition Date 08/04/2011 11:17:42 AM

Operator Tim Jones  
Instrument HCTultra

### Acquisition Parameters

|                   |              |              |            |                          |          |
|-------------------|--------------|--------------|------------|--------------------------|----------|
| Ion Source Type   | ESI          | Ion Polarity | Negative   | Alternating Ion Polarity | off      |
| Mass Range Mode   | Std/Enhanced | Scan Begin   | 50 m/z     | Scan End                 | 1500 m/z |
| Capillary Exit    | -143.5 Volt  | Skimmer      | -40.0 Volt | Trap Drive               | 78.2     |
| Accumulation Time | 8487 $\mu$ s | Averages     | 5 Spectra  | Auto MS/MS               | off      |

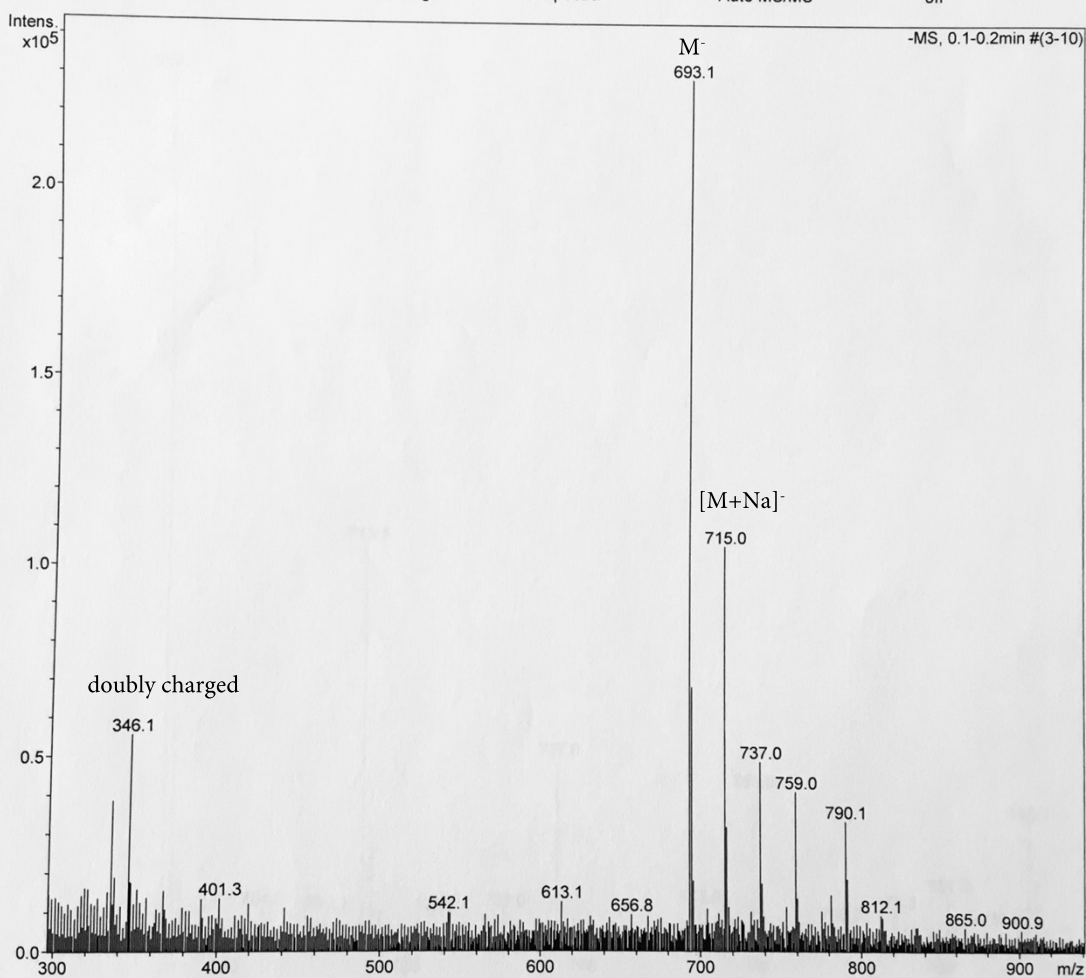

Figure S3. Mass spectrum of 2'-F-cdi-GMP under ESI negative mode.
